# Supplementary figures and images for: Anti-CD47 Monoclonal Antibody–Drug Conjugate: A Targeted Therapy to Treat Triple-Negative Breast Cancers
Source: MDPI journal article supplement (doi:10.3390/vaccines9080882), 2021-08-10

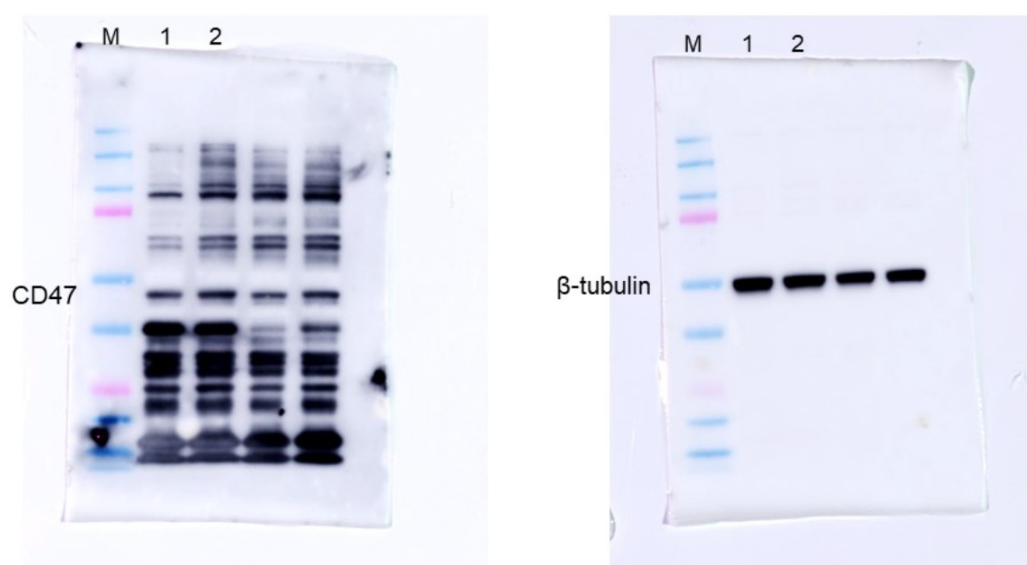

Figure S1. Original western blots data.

Supplement: s1 [file s1]
